# Supplementary material for: Platinum Selection in Immune Checkpoint Inhibitor-Based Therapy for Recurrent or Metastatic Head and Neck Cancer: A Multi-Institutional Retrospective Study
Source: Research Square preprint supplement (doi:10.21203/rs.3.rs-7990042/v1), 2025-12-22
Supplement: Supplementary file 1 [file 7e50c8f80d77f70b61789630.docx]

**A.**

| **Multivariable sensitivity analysis for PFS** | | | | |
| --- | --- | --- | --- | --- |
| **Model** | **Variable** | **Hazard Ratio** | **95% CI** | **p-value** |
| **Main model** | Carboplatin vs Cisplatin | 0.70 | 0.40–1.23 | 0.22 |
| **With p16** | Carboplatin vs Cisplatin | 0.58 | 0.32–1.04 | 0.07 |
| **With primary tumor site** | Carboplatin vs Cisplatin | 0.63 | 0.34–1.17 | 0.14 |
| **With smoking history** | Carboplatin vs Cisplatin | 0.69 | 0.39–1.22 | 0.20 |
| **With age** | Carboplatin vs Cisplatin | 0.86 | 0.44–1.68 | 0.65 |
| **With ccr** | Carboplatin vs Cisplatin | 0.73 | 0.38–1.40 | 0.34 |
| **Truncated at 24 months** | Carboplatin vs Cisplatin | 0.69 | 0.39–1.22 | 0.20 |

**B.**

| **Multivariable sensitivity analysis for OS** | | | | |
| --- | --- | --- | --- | --- |
| **Model** | **Variable** | **Hazard Ratio** | **95% CI** | **p-value** |
| **Main model** | Carboplatin vs Cisplatin | 0.68 | 0.34–1.34 | 0.27 |
| **With p16** | Carboplatin vs Cisplatin | 0.63 | 0.30–1.34 | 0.23 |
| **With primary tumor site** | Carboplatin vs Cisplatin | 0.88 | 0.31–1.80 | 0.72 |
| **With smoking history** | Carboplatin vs Cisplatin | 0.64 | 0.32–1.25 | 0.19 |
| **With age** | Carboplatin vs Cisplatin | 0.67 | 0.30–1.49 | 0.32 |
| **With ccr** | Carboplatin vs Cisplatin | 0.45 | 0.20–1.02 | 0.06 |
| **Truncated at 24 months** | Carboplatin vs Cisplatin | 0.64 | 0.31–1.33 | 0.23 |

**Supplementary Table 1.**

Each model was adjusted for the PS and CPS classifications. Additional covariates were individually included to assess the robustness of the treatment effects of carboplatin versus cisplatin. The truncated models used the landmark time points of 24 months. Cisplatin was used as a reference for all comparisons. (A) Multivariable sensitivity analysis for PFS; (B) Multivariable sensitivity analysis for OS.

**A.**

|  | **All (N=76)** | **Cisplatin (N=41)** | **Carboplatin (N=35)** | **p-value** |
| --- | --- | --- | --- | --- |
| **G3≥Non-Hematological AEs, n (%)** | 28 (36.8) | 24 (58.5) | 4 (11.4) | **<0.01** |
| **Nausea, n (%)** | 9 (11.8) | 9 (22.0) | 0 (0.0) | **<0.01** |
| **Anorexia, n (%)** | 12 (15.8) | 12 (29.3) | 0 (0.0) | **<0.01** |
| **Malaise, n (%)** | 3 (3.9) | 3 (7.3) | 0 (0.0) | 0.25 |
| **Mucositis oral, n (%)** | 3 (3.9) | 3 (7.3) | 0 (0.0) | 0.25 |
| **Diarrhoea** **, n (%)** | 5 (6.6) | 5 (12.2) | 0 (0.0) | 0.06 |
| **Creatinine increased, n (%)** | 1 (1.3) | 1 (2.4) | 0 (0.0) | 1.00 |
| **ALT increased, n (%)** | 2 (2.6) | 2 (4.9) | 0 (0.0) | 0.50 |
| **AST increased, n (%)** | 1 (1.3) | 1 (2.4) | 0 (0.0) | 1.00 |
| **GGT increased, n (%)** | 3 (3.9) | 1 (2.4) | 2 (5.7) | 0.59 |
| **ALP increased, n (%)** | 1 (1.3) | 0 (0.0) | 1 (2.9) | 0.46 |
| **Hyponatremia, n (%)** | 3 (3.9) | 2 (4.9) | 1 (2.9) | 1.00 |
| **Hypokalemia, n (%)** | 2 (2.6) | 2 (4.9) | 0 (0.0) | 0.50 |
| **Hyperkalemia, n (%)** | 1 (1.3) | 0 (0.0) | 1 (2.9) | 0.46 |
| **Peripheral sensory neuropathy, n (%)** | 1 (1.3) | 1 (2.4) | 0 (0.0) | 1.00 |
| **Thromboembolic event, n (%)** | 1 (1.3) | 1 (2.4) | 0 (0.0) | 1.00 |
| **Pneumonitis, n (%)** | 1 (1.3) | 1 (2.4) | 0 (0.0) | 1.00 |
| **Adrenal insufficiency, n (%)** | 2 (2.6) | 2 (4.9) | 0 (0.0) | 0.50 |

**B.**

|  | **All (N=76)** | **Cisplatin (N=41)** | **Carboplatin (N=35)** | **p-value** |
| --- | --- | --- | --- | --- |
| **G2≥irAEs, n (%)** | 11 (13.2) | 8 (19.5) | 2 (5.7) | 0.10 |
| **Eczema, n (%)** | 5 (6.6) | 3 (7.3) | 2 (5.7) | 1.00 |
| **Adrenal insufficiency, n (%)** | 4 (5.3) | 3 (7.3) | 1 (2.9) | 0.62 |
| **Peripheral sensory neuropathy, n (%)** | 1 (1.3) | 1 (2.4) | 0 (0.0) | 1.00 |
| **Pneumonitis, n (%)** | 1 (1.3) | 1 (2.4) | 0 (0.0) | 1.00 |

**Supplementary Table 2.**

(A) Grade ≥3 non-haematological adverse events and (B) Grade ≥2 immune-related adverse events (irAEs) were assessed according to CTCAE v5.0. Comparisons between the cisplatin and carboplatin groups were performed using the chi-squared test or Fisher’s exact test, as appropriate.
